# Supplementary material for: New Labdanes with Antimicrobial and Acaricidal Activity: Terpenes of Callitris and Widdringtonia (Cupressaceae)
Source: PubMed Central journal article supplement (PMC7235842; doi:10.3390/antibiotics9040173), 2020-04-11
Supplement: antibiotics-09-00173-s001.pdf [file antibiotics-09-00173-s001.pdf]

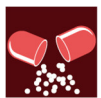

## Supplementary files

**Table S1.** Comparison of  $^{13}\text{C}$  shifts (ppm) from isocommunic acid with  $^{13}\text{C}$  shifts from compounds 4–6 by subtraction. Columns 4–6 show difference in  $^{13}\text{C}$  shifts compared to  $^{13}\text{C}$  shifts of isocommunic acid.

| Heading<br>No. | $\Delta^{13}\text{C}$<br>Isocommunic<br>Acid | $\delta^{13}\text{C}-\delta^{13}\text{C}$ |       |      |
|----------------|----------------------------------------------|-------------------------------------------|-------|------|
|                |                                              | 4                                         | 5     | 6    |
| 1              | 39.9                                         | 1.4                                       | 1.3   | 0.7  |
| 2              | 19.8                                         | 0.4                                       | 0.6   | 0.4  |
| 3              | 37.9                                         | 0.0                                       | -0.1  | 0.0  |
| 4              | 44.1                                         | 0.0                                       | 0.2   | -0.1 |
| 5              | 56.1                                         | 0.5                                       | 0.5   | 0.2  |
| 6              | 22.1                                         | -1.4                                      | 0.4   | -1.4 |
| 7              | 38.7                                         | 1.8                                       | 11.3  | 1.6  |
| 8              | 147.9                                        | 87.6                                      | 93.8  | 88.8 |
| 9              | 56.6                                         | 8.7                                       | 6.3   | 3.2  |
| 10             | 40.4                                         | -0.2                                      | 1.9   | -0.6 |
| 11             | 26.0                                         | 0.5                                       | -2.4  | 4.3  |
| 12             | 30.2                                         | -53.6                                     | -2.5  | -3.5 |
| 13             | 147                                          | 1.1                                       | 0.6   | -0.2 |
| 14             | 139                                          | 2.4                                       | 0.4   | 0.2  |
| 15             | 113.2                                        | -1.8                                      | -0.5  | -0.5 |
| 16             | 115.5                                        | 0.0                                       | -0.9  | -0.5 |
| 17             | 106.4                                        | 56.0                                      | -98.8 | 55.8 |
| 18             | 28.9                                         | -0.2                                      | -0.1  | -0.2 |
| 19             | 183.6                                        | 1.3                                       | 0.9   | 0.0  |
| 20             | 12.8                                         | -0.5                                      | 0.1   | -0.4 |

**Table S2.** Comparison of  $^{13}\text{C}$  shifts for 7 and 8 to cis (*Z*-) and trans (*E*-) communic acids. Column 1 gives ppm difference of 7 and 8  $^{13}\text{C}$  shifts compared to *E*-communic acid and column 2 compares to *Z*-communic acid.

| Heading<br>No. | Column 1                                |                                                              |                                                              | Column 2                                |                                                              |                                                              |
|----------------|-----------------------------------------|--------------------------------------------------------------|--------------------------------------------------------------|-----------------------------------------|--------------------------------------------------------------|--------------------------------------------------------------|
|                | $\delta^{13}\text{C}$<br><i>E</i> -comm | $\delta^{13}\text{C}-\delta^{13}\text{C}$<br>7 ( <i>E</i> -) | $\delta^{13}\text{C}-\delta^{13}\text{C}$<br>8 ( <i>Z</i> -) | $\delta^{13}\text{C}$<br><i>Z</i> -comm | $\delta^{13}\text{C}-\delta^{13}\text{C}$<br>7 ( <i>E</i> -) | $\delta^{13}\text{C}-\delta^{13}\text{C}$<br>8 ( <i>Z</i> -) |
| 1              | 39.5                                    | -0.2                                                         | -0.3                                                         | 39.5                                    | -0.2                                                         | -0.3                                                         |
| 2              | 20.1                                    | 0.7                                                          | 0.7                                                          | 20.1                                    | 0.7                                                          | 0.7                                                          |
| 3              | 38.1                                    | 0.2                                                          | 0.2                                                          | 38.1                                    | 0.2                                                          | 0.2                                                          |
| 4              | 44.4                                    | 0.2                                                          | 0.2                                                          | 44.4                                    | 0.2                                                          | 0.2                                                          |
| 5              | 56.5                                    | 0.7                                                          | 0.7                                                          | 56.5                                    | 0.7                                                          | 0.7                                                          |
| 6              | 26.0                                    | 2.6                                                          | 2.6                                                          | 26.0                                    | 2.6                                                          | 2.6                                                          |
| 7              | 38.7                                    | 2.0                                                          | 2.0                                                          | 38.7                                    | 2.0                                                          | 2.0                                                          |
| 8              | 148.1                                   | 89.3                                                         | 89.3                                                         | 148.1                                   | 89.3                                                         | 89.3                                                         |
| 9              | 56.6                                    | 2.3                                                          | 2.1                                                          | 56.9                                    | 2.6                                                          | 2.4                                                          |
| 10             | 40.6                                    | -0.4                                                         | -0.5                                                         | 40.6                                    | -0.4                                                         | -0.5                                                         |
| 11             | 23.5                                    | 2.4                                                          | 3.3                                                          | 23.5                                    | 2.4                                                          | 3.3                                                          |
| 12             | 134.1                                   | -1.0                                                         | 1.3                                                          | 131.9                                   | -3.2                                                         | -0.9                                                         |
| 13             | 133.6                                   | 0.9                                                          | 2.7                                                          | 131.7                                   | -1.0                                                         | 0.8                                                          |
| 14             | 141.8                                   | 0.0                                                          | 7.9                                                          | 133.9                                   | -7.9                                                         | 0.0                                                          |
| 15             | 110.1                                   | -0.1                                                         | -3.3                                                         | 113.4                                   | 3.2                                                          | 0.0                                                          |
| 16             | 12.0                                    | -11.6                                                        | -7.9                                                         | 12.0                                    | -11.6                                                        | -7.9                                                         |
| 17             | 107.9                                   | 57.6                                                         | 57.6                                                         | 108.0                                   | 57.7                                                         | 57.7                                                         |
| 18             | 29.2                                    | 0.0                                                          | 0.0                                                          | 29.2                                    | 0.0                                                          | 0.0                                                          |

|    |       |      |      |       |      |      |
|----|-------|------|------|-------|------|------|
| 19 | 184.4 | 1.0  | 0.9  | 184.4 | 1.0  | 0.9  |
| 20 | 13.0  | -0.3 | -0.3 | 13.0  | -0.3 | -0.3 |

**Table S3.** 13C NMR shifts ( $\delta$ , CDCl<sub>3</sub>) for 8*R*-spiroepoxy labdanes taken from the literature compared to 4 and 6 and the aldehyde 5: AR [1]; BR [2]; CR & DR [3]; ER, FR & GR [4]; HR [5]. See Figure S2 for the structures.

| Epimer | 8R    | 8R    | 8R     | 8R    | 8R    | 8R   | 8R    | 8R    | 8R    | 8R    | 8R    | 8R    | 8R    |
|--------|-------|-------|--------|-------|-------|------|-------|-------|-------|-------|-------|-------|-------|
| Figure | AR    | BR    | CR     | DR    | ER    | FR   | GR    | HR    | 4     | 5     | 6     | 7     | 8     |
| 1      | 40.6  | 38.9  | 40.56  | 42.23 | 39.4  | 39.3 | 39.3  | 39.2  | 38.5  | 38.6  | 39.2  | 39.7  | 39.8  |
| 2      | 19.8  | 18.6  | 19.21  | 19.27 | 19.3  | 18.2 | 19.2  | 18.7  | 19.4  | 19.2  | 19.4  | 19.4  | 19.5  |
| 3      | 37.7  | 41.8  | 37.99  | 37.84 | 37.8  | 35.3 | 37.7  | 41.8  | 37.9  | 38.0  | 37.9  | 37.9  | 37.9  |
| 4      | 43.9  | 33.3  | 44.01  | 43.89 | 44.0  | 40.2 | 43.9  | 33.4  | 44.1  | 43.9  | 44.2  | 44.2  | 44.2  |
| 5      | 54.8  | 54.9  | 55.22  | 55.08 | 55.7  | 55.7 | 55.7  | 54.5  | 55.6  | 55.6  | 55.9  | 55.8  | 55.8  |
| 6      | 22.9  | 24.8  | 23.15  | 23.26 | 23.0  | 21.8 | 23.3  | 21.7  | 23.5  | 21.7  | 23.5  | 23.4  | 23.4  |
| 7      | 36.0  | 36.6  | 36.07  | 36.21 | 39.1  | 38.9 | 39.1  | 39.7  | 36.9  | 27.4  | 37.1  | 36.7  | 36.7  |
| 8      | 58.1  | 59.3  | 58.24  | 58.93 | 59.0  | 58.9 | 58.8  | 58.9  | 60.3  | 54.1  | 59.1  | 58.8  | 58.9  |
| 9      | 57.4  | 53.1  | 57.45  | 60.49 | 53.9  | 51.6 | 53.8  | 55.1  | 47.9  | 50.3  | 53.4  | 54.3  | 54.5  |
| 10     | 40.8  | 40.2  | 39.47  | 40.4  | 41.0  | 38.6 | 40.9  | 40.2  | 40.6  | 38.5  | 41    | 41    | 41.1  |
| 11     | 140.3 | 16.1  | 123.09 | 65.15 | 19.5  | 19.3 | 19.3  | 22.5  | 25.5  | 28.4  | 21.7  | 21.1  | 20.2  |
| 12     | 135.8 | 45.0  | 138.65 | 66.06 | 36.8  | 36.7 | 36.7  | 160.4 | 83.8  | 32.7  | 33.7  | 135.1 | 132.8 |
| 13     | 197.0 | 208.9 | 71.19  | 51.99 | 30.0  | 30.0 | 30.2  | 133.8 | 145.9 | 146.4 | 147.2 | 132.7 | 130.9 |
| 14     | 27.9  | 29.8  | 76.88  | -     | 39.6  | 39.7 | 35.3  | 36.1  | 136.6 | 138.6 | 138.8 | 141.8 | 133.9 |
| 15     | -     | -     | 14.7   | -     | 60.9  | 60.8 | 63.0  | 197.6 | 115.0 | 113.7 | 113.7 | 110.2 | 113.4 |
| 16     | -     | -     | 25.4   | 20.3  | 19.6  | 19.6 | 19.5  | 193.7 | 115.5 | 116.4 | 116   | 23.6  | 19.9  |
| 17     | 50.5  | 50.7  | 50.33  | 50.63 | 50.4  | 50.6 | 50.2  | 50.5  | 50.4  | 205.2 | 50.6  | 50.3  | 50.3  |
| 18     | 28.8  | 21.5  | 28.77  | 28.75 | 29.0  | 27.0 | 28.9  | 33.5  | 29.1  | 29.0  | 29.1  | 29.2  | 29.2  |
| 19     | 180.0 | 33.4  | 177.52 | 177.3 | 183.2 | 67.9 | 183.3 | 21.7  | 182.3 | 182.7 | 183.6 | 183.5 | 183.5 |
| 20     | 13.9  | 14.5  | 13.59  | 14.42 | 12.9  | 15.2 | 12.9  | 14.7  | 13.3  | 12.7  | 13.2  | 13.3  | 13.3  |

**Table S4.** 13C NMR shifts ( $\delta$ , CDCl<sub>3</sub>) for 8*S*-spiroepoxy labdanes taken from the literature: AS [2]; BS & CS [5]; DS & ES [6]. See Figure S3 for the structures.

| Epimer | 8S    | 8S    | 8S    | 8S    | 8S    |
|--------|-------|-------|-------|-------|-------|
| Figure | AS    | BS    | CS    | DS    | ES    |
| 1      | 38.8  | 39.6  | 39.3  | 40.7  | 39.6  |
| 2      | 18.5  | 18.4  | 18.6  | 21.6  | 19.0  |
| 3      | 42.0  | 42.0  | 41.9  | 43.6  | 42.3  |
| 4      | 33.4  | 33.6  | 33.5  | 34.9  | 33.9  |
| 5      | 55.0  | 52.8  | 52.4  | 54.9  | 53.7  |
| 6      | 20.1  | 20.0  | 20.0  | 20.1  | 20.5  |
| 7      | 35.9  | 39.6  | 35.8  | 37.5  | 36.3  |
| 8      | 57.1  | 57.6  | 57.5  | 59.7  | 57.7  |
| 9      | 52.0  | 55.2  | 55.0  | 56.6  | 55.4  |
| 10     | 40.0  | 40.0  | 39.6  | 41.3  | 40.2  |
| 11     | 15.6  | 22.4  | 22.8  | 21.2  | 20.6  |
| 12     | 45.4  | 161.2 | 142.8 | 133.7 | 140.1 |
| 13     | 208.1 | 136.0 | 124.8 | 139.2 | 129.1 |
| 14     | 29.7  | 36.0  | 25.4  | 72.3  | 70.5  |
| 15     | -     | 198.0 | 65.3  | 66.5  | 64.5  |
| 16     | -     | 194.0 | 171.2 | 64.3  | 65.4  |
| 17     | 48.7  | 48.8  | 49.0  | 50.7  | 49.4  |
| 18     | 21.7  | 33.6  | 33.5  | 34.5  | 33.9  |
| 19     | 33.4  | 21.6  | 21.7  | 22.6  | 22.1  |
| 20     | 14.4  | 14.8  | 14.6  | 15.7  | 15.0  |

**Table S5.** 1H NMR of vinylic protons at the C17 methylene position in the 8*R* or 8*S* spiroepoxy moiety: AR [1]; BS & CS [4]; DS and ES [6].

| Epimer | 8R            | 8R                    | 8R                    | 8R                 | 8R                 |
|--------|---------------|-----------------------|-----------------------|--------------------|--------------------|
| Figure | AR            | 4                     | 6                     | 7                  | 8                  |
| C17    | 2.56, d (4),  | 2.60, brd (3.89)      | 2.53, d (4.34)        | 2.56, d (4.3)      | 2.55, d (4.3)      |
|        | 2.74, d (4)   | 2.82, dd (1.97, 3.89) | 2.76, dd (1.87, 4.34) | 2.7, dd (1.8, 4.3) | 2.7, dd (1.8, 4.3) |
| Epimer | 8S            | 8S                    | 8S                    | 8S                 | -                  |
| Figure | BS            | CS                    | DS                    | ES                 | -                  |
| C17    | 2.27, d (3.5) | 2.29, d (3.9)         | 2.3, d (3.8)          | 2.2, d (3.8)       | -                  |
|        | 2.42, d (3.5) | 2.43, d (3.9)         | 2.7, d (3.8)          | 2.58, d (3.8)      | -                  |

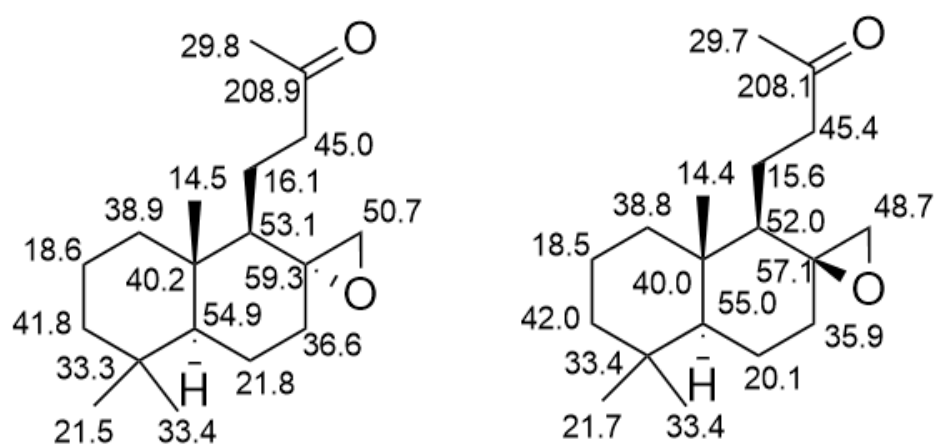

**Figure S1.** Standard chemical shifts for 8-spiroepoxy labdanes in the *R* and *S* configurations, as proposed by Bastard et al., [2].

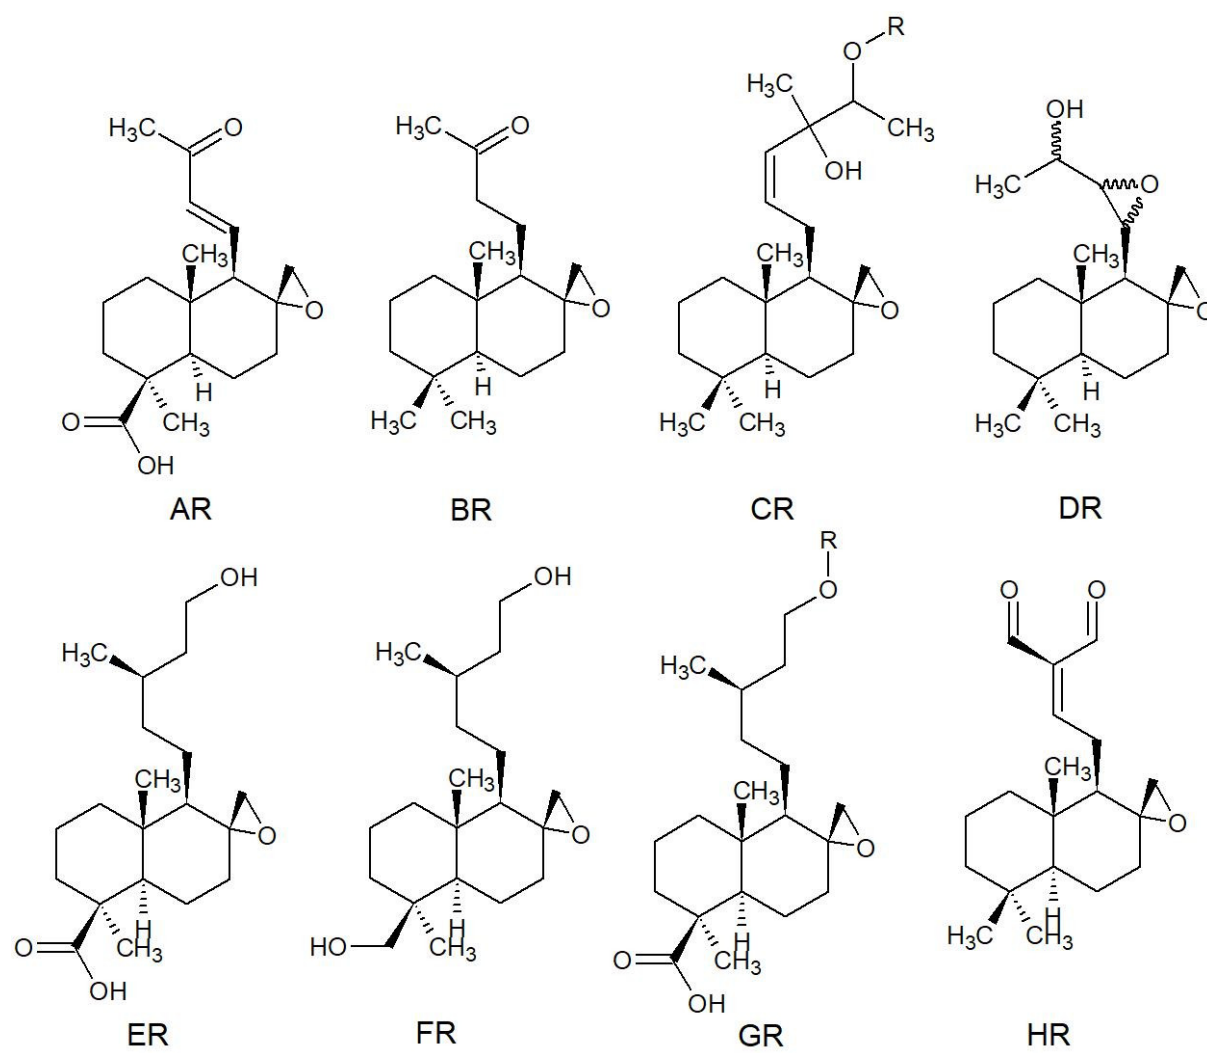

Figure S2. Labdanes with 8R-spiroepoxy conformation.

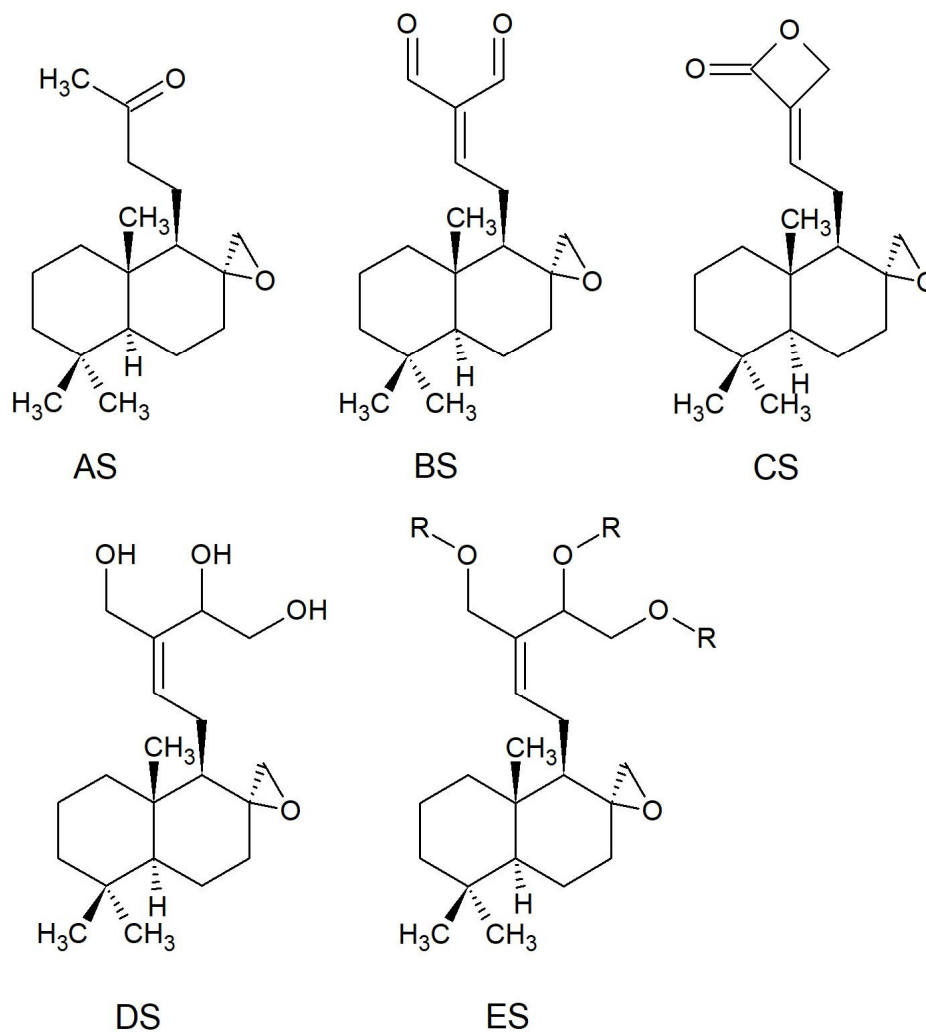

**Figure S3.** Labdanes with 8S-spiroepoxy conformation.

## References

1. Fang, J.-M.; Sou, Y.-C.; Chiu, Y.-H.; Cheng, Y.-S. Diterpenes from the bark of *juniperus chinensis*. *Phytochemistry* **1993**, *34*, 1581-1584.
2. Bastard, J.; Duc, D.K.; Fetizon, M.; Francis, M.J.; Grant, P.K.; Weavers, R.T.; Kaneko, C. Cmr spectroscopy of labdanic diterpenes and related substances. *Journal of Natural Products* **1984**, *47*, 592-599.
3. Barrero, A.F.; Altarejos, J. <sup>13</sup>C nmr data for labdane diterpenes. *Magnetic Resonance in Chemistry* **1993**, *31*, 299-308.
4. Schmeda-Hirschmann, G.; Astudillo, L.; Sepulveda, B.; Rodriguez, J.A.; Theoduloz, C.; Yanez, T.; Palenzuela, J.A. Gastroprotective effect and cytotoxicity of natural and semisynthetic labdane diterpenes from *araucaria araucana* resin. *Zeitschrift fur Naturforschung. C, Journal of biosciences* **2005**, *60c*, 511-522.
5. Morita, H.; Itokawa, H. Cytotoxic and antifungal diterpenes from the seeds of *alpinia galanga*. *Planta Medica* **1987**, *54*, 117-120.
6. Sob, S.V.T.; Tane, P.; Ngadjui, B.T.; Connolly, J.D.; Ma, D. Trypanocidal labdane diterpenoids from the seeds of *aframomum aulacocarpos* (zingiberaceae). *Tetrahedron* **2007**, *63*, 8993-8998.
